# Supplementary material for: Operation of the Atypical Canonical Bone Morphogenetic Protein Signaling Pathway During Early Human Odontogenesis
Source: Frontiers journal article supplement (doi:10.3389/fphys.2022.823275), 2022-02-08
Supplement: Data_Sheet_1.PDF [file Data_Sheet_1.PDF]

1 **Operation of the atypical canonical BMP signaling pathway during early human**  
2 **odontogenesis**  
3 **Supplementary material**

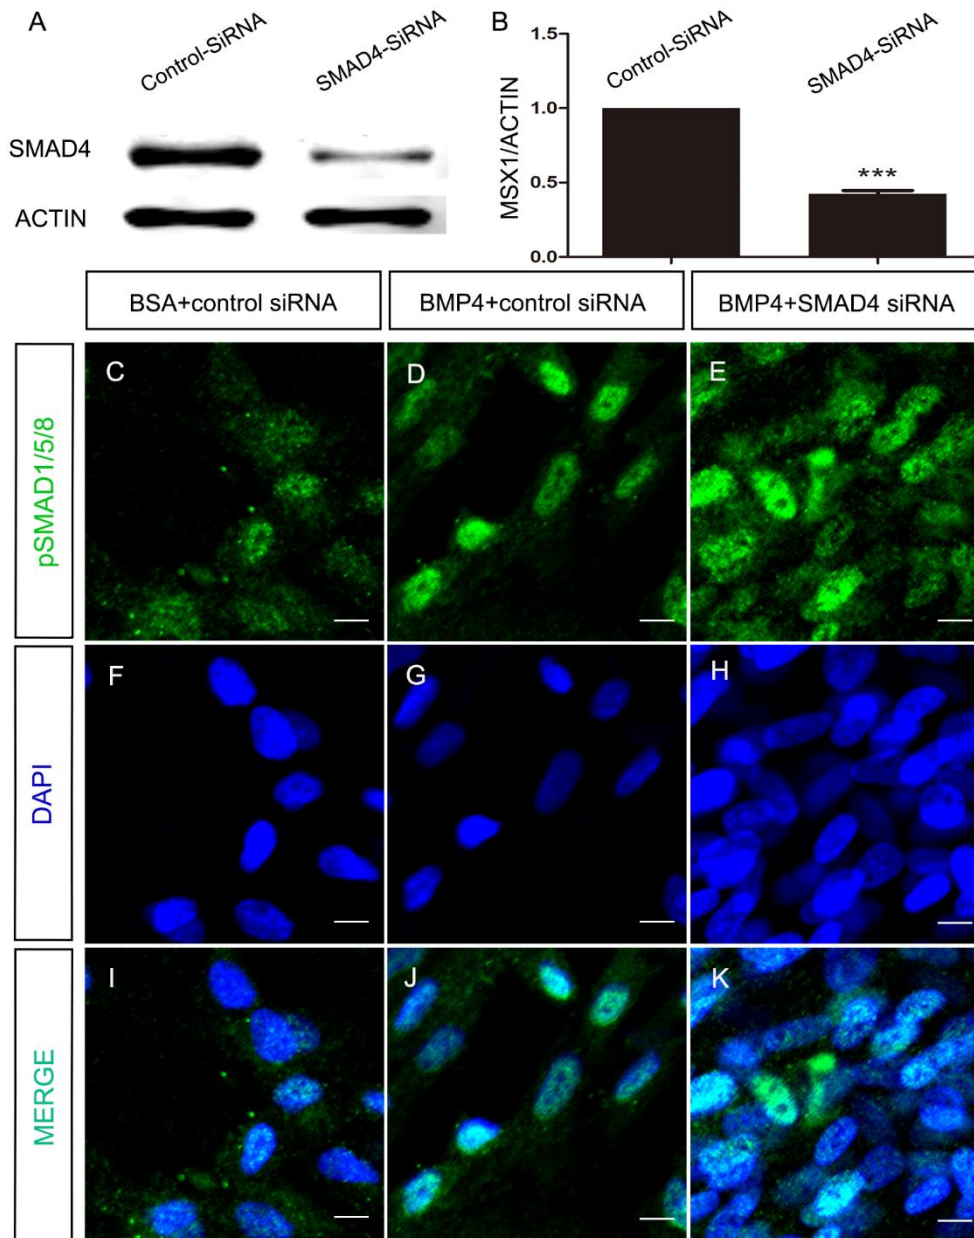

4

5 **Supplementary Figure 1. SMAD4 is not required for BMP4-**  
6 **induced pSMAD1/5/8 nuclear translocation in the ihDMCs.** (A, B) Western blot  
7 shows about 60% knockdown efficiency of SMAD4 siRNA. (C-K) Immunostaining  
8 shows that BMP4-induced nuclear translocation of pSMAD1/5/8 is not effected by  
9 knockdown of *SMAD4*. Error bars represent standard deviation. \*\*\*, p < 0.001.  
10 Bar=10um.

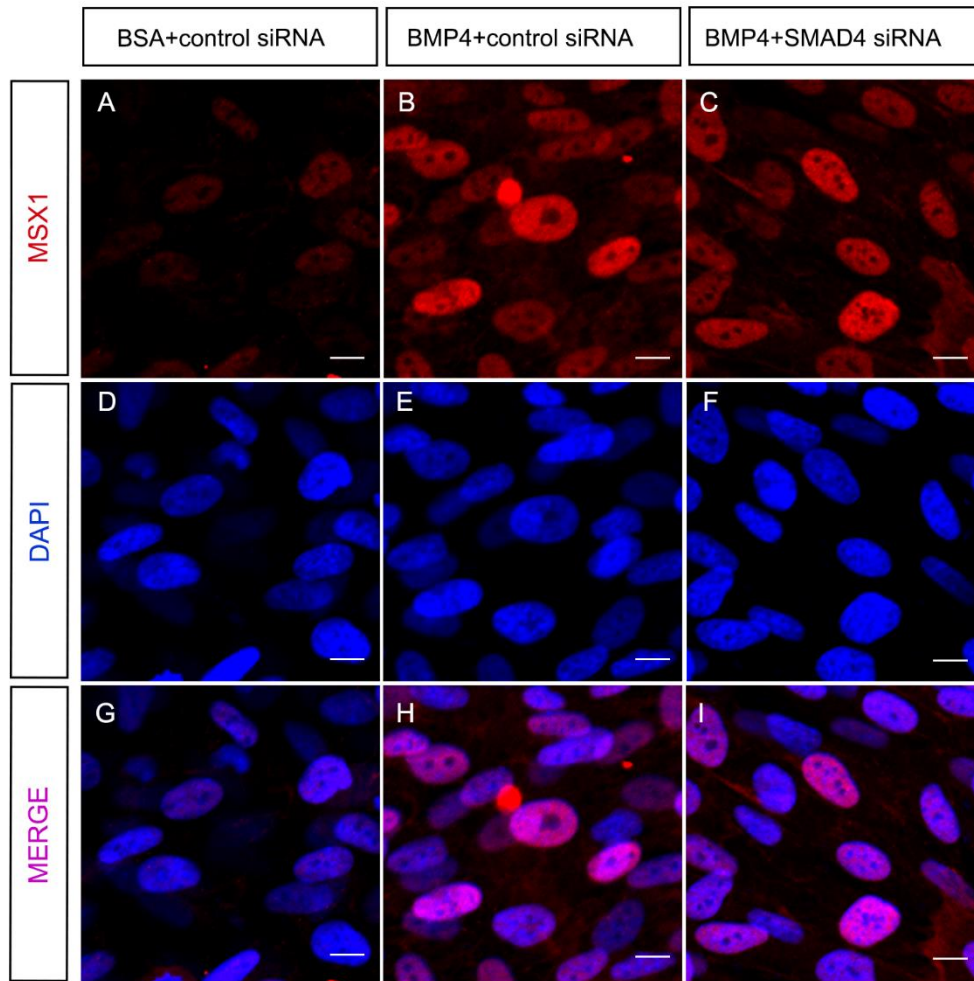

11

12 **Supplementary Figure 2. SMAD4 is not required for BMP4-**  
 13 **induced Msx1 expression in the ihDMCs. (A-I)** Immunostaining shows that BMP4-  
 14 induced MSX1 expression is not effected by knockdown of *SMAD4*. Bar=10um
