# Supplementary material for: Operation of the Atypical Canonical Bone Morphogenetic Protein Signaling Pathway During Early Human Odontogenesis
Source: Front Physiol. 2022 Feb 8;13:823275. doi: 10.3389/fphys.2022.823275 (PMC8863179; doi:10.3389/fphys.2022.823275)
Supplement: Supplementary file 1 [file Table_1.XLSX]

## Sheet: Table S1
Table S1: The list of genes involved in BMP/pSMAD1/5/8 in human dental mesenchyme
Upregulation						Downregulation
Log2 of Fold Change				log2 transformed transcript level		Log2 of Fold Change				log2 transformed transcript level
Gene ID	Gene Symbol	BMP4 vs BSA	Dorsomorphin vs DMSO	SMAD4 siRNA	Control siRNA	Gene ID	Gene Symbol	BMP4 vs BSA	Dorsomorphin vs DMSO	SMAD4 siRNA	Control siRNA
5243	ABCB1	1.64995	-1.86458	1.2766	0.601061	21	ABCA3	-1.61958	1.6125	0.255318	0.0402568
653190	ABCC6P1	1.43834	-2.27996	#N/A	#N/A	390928	ACP7	-1.31114	3.01513	#N/A	#N/A
51225	ABI3	1.26756	-4.9094	-0.682742	-0.0805147	8751	ADAM15	-1.48143	1.42116	5.52861	4.44873
176	ACAN	2.29969	-2.68706	5.23446	6.92466	57211	ADGRG6	-1.77657	3.13542	#N/A	#N/A
70	ACTC1	1.94277	-2.37728	-0.646906	3.19071	166	AES	-1.1255	1.2261	9.37283	7.65557
89	ACTN3	1.55422	-2.65047	-1.79603	-3.66281	134265	AFAP1L1	-1.07311	1.53273	2.83577	2.92382
100	ADA	1.90528	-1.38264	3.37831	3.05237	205	AK4	-1.22509	2.44044	1.4695	2.34824
81794	ADAMTS10	1.03914	-1.42876	4.32031	2.08456	11217	AKAP2	-1.05791	2.29109	8.03245	9.46156
170689	ADAMTS15	3.022	-2.95752	-0.424431	0.553786	259173	ALS2CL	-1.0281	1.37297	2.09223	2.76606
56999	ADAMTS9	1.96632	-3.24291	4.09831	3.25628	155185	AMZ1	-1.32076	2.23697	1.29902	2.07744
100507098	ADAMTS9-AS2	1.38505	-1.91254	0.349961	0.155378	51129	ANGPTL4	-3.48436	2.06635	1.94214	3.68451
111	ADCY5	1.01713	-2.43805	1.70903	1.99697	55107	ANO1	-1.89499	1.98427	1.11727	1.45601
147	ADRA1B	2.14568	-3.7611	3.15971	3.82528	306	ANXA3	-1.33775	2.24079	2.02122	-2.004
2334	AFF2	1.81157	-2.62846	5.47303	5.82611	316	AOX1	-1.31661	1.94036	2.5257	3.08563
9495	AKAP5	2.39868	-4.42716	1.45426	4.46578	321	APBA2	-1.83453	1.0278	0.00014	-0.537476
80709	AKNA	1.1219	-2.03874	5.53974	5.52963	374	AREG	-1.07321	5.22984	-0.489738	-3.8578
51378	ANGPT4	2.08377	-1.37582	-2.03286	0.015914	58504	ARHGAP22	-1.34229	1.81218	6.83822	6.2421
288	ANK3	1.6924	-2.95294	1.74145	2.50808	140458	ASB5	-2.00522	2.28831	0.00851702	3.68843
162282	ANKFN1	1.06173	-4.98089	-3.12936	-3.08382	57194	ATP10A	-1.19716	1.27577	2.91412	4.12067
10307	APBB3	1.12913	-1.18106	5.02322	4.62959	5205	ATP8B1	-1.54891	2.03295	4.43679	6.49256
60489	APOBEC3G	1.54292	-2.29782	1.45875	2.0993	55971	BAIAP2L1	-1.0826	1.4429	4.466	3.60302
341	APOC1	1.04558	-1.13813	0.234463	-2.8578	8412	BCAR3	-1.27311	1.08108	5.28422	5.55261
128272	ARHGEF19	1.84238	-2.78612	3.49447	3.87906	597	BCL2A1	-1.85911	4.62059	0.297462	-1.37132
80117	ARL14	2.04426	-3.05024	-0.803599	1.70363	598	BCL2L1	-1.80695	1.47792	7.77793	6.28647
54622	ARL15	1.00702	-1.08221	4.20103	5.10697	605	BCL7A	-1.0959	2.45097	5.09056	4.02914
140462	ASB9	1.25797	-1.06907	-0.159106	0.423335	222389	BEND7	-1.14543	1.52997	2.8897	1.98722
9311	ASIC3	1.51092	-2.32732	1.56513	1.01306	23299	BICD2	-2.33046	1.18041	6.61127	5.35652
434	ASIP	1.42675	-2.40964	-1.05523	-3.19113	140707	BRI3BP	-1.03853	1.44035	3.04152	5.09747
84913	ATOH8	2.50762	-4.73969	6.28679	7.79581	79669	C3orf52	-1.48573	1.39164	1.8634	1.8978
114041	B3GALT5-AS1	1.61608	-1.5113	0.535865	1.09086	90355	C5orf30	-1.40972	1.06675	3.77452	4.61627
25805	BAMBI	2.15384	-3.60877	5.40129	5.6918	57091	CASS4	-1.02557	3.66609	-3.04168	-2.8578
79656	BEND5	1.92511	-1.44745	1.15268	0.0836781	857	CAV1	-1.2022	1.27232	8.98495	9.04688
90427	BMF	2.79178	-3.08305	6.47025	6.74605	284119	CAVIN1	-1.14029	1.65591	#N/A	#N/A
121551	BTBD11	1.30508	-3.69392	3.26857	4.05297	347273	CAVIN4	-1.27767	2.91161	#N/A	#N/A
11119	BTN3A1	1.29553	-1.38015	4.86327	4.51175	933	CD22	-1.17762	1.25412	-0.613213	0.369395
10384	BTN3A3	1.3722	-1.87793	4.45822	4.0948	64866	CDCP1	-1.08142	3.19374	5.05483	3.48628
29125	C11orf21	2.45109	-1.92765	4.01028	1.51988	8999	CDKL2	-1.14141	1.12804	1.77195	0.349756
399949	C11orf88	1.00474	-3.32421	-1.51336	-0.633656	57214	CEMIP	-1.06192	6.58225	1.38432	6.91959
79630	C1orf54	1.20002	-1.05859	3.28603	3.05075	283638	CEP170B	-1.15035	1.56893	7.12508	6.47521
114904	C1QTNF6	1.201	-1.85327	6.25308	4.83821	1131	CHRM3	-2.79955	3.18172	1.42707	-0.347338
114905	C1QTNF7	1.04969	-2.67848	1.41127	-1.04134	9435	CHST2	-1.39432	2.12399	7.62986	4.2135
719	C3AR1	2.98398	-3.3227	1.74982	1.58008	9076	CLDN1	-1.05403	3.54013	3.90809	5.97062
219621	CABCOCO1	1.22031	-2.37579	#N/A	#N/A	1212	CLTB	-1.0981	1.37941	5.80079	5.6198
8913	CACNA1G	2.22696	-3.26974	2.00322	1.00093	1295	COL8A1	-1.11269	1.32313	7.21652	7.70772
59284	CACNG7	2.77483	-1.42176	3.07874	0.710266	10391	CORO2B	-1.22333	1.25431	4.71241	3.82605
10203	CALCRL	2.26194	-2.91437	1.2412	1.62248	27132	CPNE7	-1.35169	1.29901	4.62936	2.66144
57172	CAMK1G	1.4014	-2.14637	0.0709424	-0.980537	1428	CRYM	-1.67971	2.077	-0.0693892	-3.43679
146206	CARMIL2	1.99287	-2.68136	#N/A	#N/A	1508	CTSB	-1.04946	1.5801	11.216	10.6549
652968	CASTOR1	1.41358	-1.32337	#N/A	#N/A	79007	DBNDD1	-1.70499	2.38823	3.94333	2.45398
79839	CCDC102B	1.40156	-3.23218	3.1064	1.28307	115265	DDIT4L	-2.03107	2.73102	4.56093	0.297561
79140	CCDC28B	1.71098	-1.48016	3.80699	3.89445	1826	DSCAM	-1.63319	1.91738	-4.43166	0.172203
114800	CCDC85A	1.19285	-2.81592	3.47978	6.50475	1829	DSG2	-1.26777	2.19912	3.36334	1.18981
220388	CCDC89	1.10146	-2.66263	-1.72189	-1.34302	1832	DSP	-1.70951	1.3395	6.62132	6.04072
901	CCNG2	1.1357	-1.26767	5.95229	5.94049	78986	DUSP26	-1.35546	1.33193	-1.86024	-1.40724
1230	CCR1	1.32293	-2.3395	-2.63422	0.130997	1846	DUSP4	-1.32014	4.49122	2.6156	3.14973
51286	CEND1	1.97409	-1.15715	3.46701	4.29639	1848	DUSP6	-1.09068	1.8165	6.78796	5.58792
79094	CHAC1	2.26732	-2.17671	6.02487	6.52904	1889	ECE1	-1.01879	1.63057	8.52061	6.03763
10752	CHL1	2.4524	-3.87932	0.844687	3.92581	1958	EGR1	-2.01091	1.78918	6.97001	3.88462
1132	CHRM4	2.12681	-4.33596	2.59977	0.902338	29924	EPN1	-1.35473	1.01685	8.24408	6.8933
55584	CHRNA9	1.2592	-1.9327	0.659059	0.32813	2069	EREG	-3.39913	6.0396	-0.504536	-1.18988
152189	CMTM8	1.52783	-1.80247	2.41624	1.34077	30001	ERO1A	-1.28621	1.01277	#N/A	#N/A
7373	COL14A1	1.43187	-1.07439	3.41764	0.34438	11082	ESM1	-1.27008	1.24896	-0.0777529	-0.704654
1310	COL19A1	1.69175	-2.26594	-1.58269	-0.585826	220108	FAM124A	-1.82735	4.33605	-0.0604808	-0.592031
1281	COL3A1	1.33969	-2.21433	9.99963	5.84552	11153	FICD	-1.11607	2.17765	3.38859	3.81446
1298	COL9A2	1.01525	-3.07794	4.73025	0.518003	2319	FLOT2	-1.12383	1.71417	7.18578	5.61063
57699	CPNE5	1.68395	-5.18146	2.38802	0.426118	64122	FN3K	-1.07497	1.0907	4.3888	2.73569
56265	CPXM1	2.35807	-1.30387	3.3239	4.44536	23048	FNBP1	-1.00548	1.3099	5.6399	4.87141
80034	CSRNP3	1.41883	-2.9542	1.66044	3.12912	2352	FOLR3	-1.72592	1.27588	1.77241	-0.755524
2919	CXCL1	2.56181	-1.3671	-3.62067	0.191105	2354	FOSB	-1.35438	1.38098	0.933174	0.11681
6372	CXCL6	1.53839	-1.2166	-3.95998	-2.29098	8061	FOSL1	-1.02947	2.72928	6.13858	7.33698
51523	CXXC5	1.35303	-3.19543	7.07878	7.87949	400236	FOXN3-AS1	-1.02864	1.32185	1.05926	-0.301503
116159	CYYR1	1.28932	-2.09822	2.80186	2.35661	11226	GALNT6	-1.23285	1.64447	5.98467	6.1527
1602	DACH1	1.42186	-2.29658	0.772374	2.05466	257144	GCSAM	-1.39826	1.43411	-2.21704	-1.90238
8642	DCHS1	1.31753	-1.43359	8.04814	6.84918	392255	GDF6	-1.31134	2.28679	-1.22187	-2.8578
11067	DEPP1	1.66086	-3.78767	#N/A	#N/A	51228	GLTP	-1.18261	1.59845	6.17554	5.43286
64798	DEPTOR	1.60917	-1.96646	3.74358	4.47012	2767	GNA11	-1.04118	1.21231	7.6997	7.0921
84649	DGAT2	1.31982	-1.77343	-0.298029	0.0111751	2817	GPC1	-1.52772	1.76014	9.33214	8.08676
1734	DIO2	1.37492	-3.14037	0.408878	1.05643	2827	GPR3	-1.50801	1.17851	1.78931	1.55064
1735	DIO3	1.84009	-1.56242	-1.79203	-0.786358	2917	GRM7	-1.10959	1.48392	-1.1219	-4.02932
22943	DKK1	2.1022	-5.47761	6.5971	8.40869	283464	GXYLT1	-1.10118	1.39459	4.75399	5.02107
27120	DKKL1	1.13405	-1.55873	-1.52691	-2.23298	1404	HAPLN1	-2.0821	2.21445	3.76486	5.43565
1745	DLX1	1.23818	-1.70333	7.25269	7.60155	1839	HBEGF	-1.14699	1.64719	3.19062	4.81227
1746	DLX2	1.24553	-2.73136	6.89445	7.86794	57801	HES4	-1.00091	2.34418	0.903932	0.29031
1747	DLX3	2.13831	-6.50649	2.68276	1.82083	8339	HIST1H2BG	-1.36457	1.56508	1.59542	1.30737
1749	DLX5	1.52819	-2.44711	7.02231	6.97173	8970	HIST1H2BJ	-1.09594	1.67737	1.78625	0.693747
1750	DLX6	1.98599	-3.05021	5.62996	4.53188	23463	ICMT	-1.07238	1.17844	7.66141	7.26253
285987	DLX6-AS1	1.7723	-3.56053	3.05468	3.63989	3620	IDO1	-1.1812	2.43079	-3.37501	-2.39369
56521	DNAJC12	1.20806	-4.02871	0.0340575	-0.662811	9592	IER2	-1.39415	2.62187	6.28539	5.41279
79962	DNAJC22	1.30638	-3.76599	3.1369	0.89994	3592	IL12A	-1.00357	1.3111	-0.947919	1.47225
100628315	DNM3OS	1.42423	-4.2026	4.99638	4.60426	3598	IL13RA2	-1.90884	4.40266	-5.06131	-5.06644
9046	DOK2	1.67822	-1.52761	-0.258553	0.801295	132014	IL17RE	-1.31324	1.75117	0.848308	0.646942
1844	DUSP2	2.14154	-4.22652	3.88873	2.77623	9118	INA	-1.75335	1.47133	4.98896	5.54833
79645	EFCAB1	1.15508	-1.68322	0.349175	-0.538012	3710	ITPR3	-1.06666	1.61778	6.68432	5.54088
1949	EFNB3	2.34188	-1.82899	3.22989	2.58655	85450	ITPRIP	-1.05036	4.93981	6.82203	6.61225
22979	EFR3B	1.32865	-3.84269	4.16	3.93148	3745	KCNB1	-1.27865	2.12622	-0.638049	-3.8578
112399	EGLN3	2.91904	-3.70451	-0.234845	1.80383	3759	KCNJ2	-2.53294	3.39949	-0.646906	-1.59734
114794	ELFN2	1.15334	-2.7012	0.352313	1.7306	3763	KCNJ6	-1.14734	1.92949	-3.57	-0.824341
2006	ELN	2.01035	-1.4418	6.05997	7.42085	386618	KCTD4	-1.61759	5.19945	-1.2375	3.60037
2042	EPHA3	1.11338	-4.58611	4.52313	3.67065	9856	KIAA0319	-1.13434	2.48364	-2.32435	-3.8578
2045	EPHA7	1.20319	-3.67613	0.442056	-2.30985	57648	KIAA1522	-1.695	1.06547	6.65341	4.7617
2049	EPHB3	1.29172	-1.60156	5.75159	4.39083	10749	KIF1C	-1.69909	1.10697	8.23775	7.05711
339768	ESPNL	1.1586	-1.78778	1.93727	2.52433	688	KLF5	-1.87805	4.24429	1.66403	2.56411
283849	EXOC3L1	1.04517	-1.95739	1.52676	0.858096	1316	KLF6	-1.09501	2.40827	7.9563	7.82465
2139	EYA2	1.5054	-2.38581	2.15657	1.66478	3885	KRT34	-1.80297	2.26853	-5.11198	-5.06644
2155	F7	1.05943	-1.50763	0.697261	-0.107238	3918	LAMC2	-1.65499	1.44732	1.60616	3.52078
23017	FAIM2	1.32086	-1.7683	4.81523	0.238811	26524	LATS2	-1.18354	2.41715	5.61916	6.78738
51313	FAM198B	1.01819	-2.91299	3.31175	3.27671	55679	LIMS2	-2.04796	2.09125	2.56512	1.90602
2212	FCGR2A	1.52359	-1.2534	-3.57	-3.32948	645687	LINC00520	-1.93	1.47071	-3.85267	-5.01578
2263	FGFR2	1.94611	-2.13411	3.3096	2.81875	101927528	LINC01204	-1.06108	2.03087	-3.32918	-0.390838
2261	FGFR3	2.02364	-7.32303	4.50816	2.48641	378805	LINC-PINT	-1.02211	1.12378	3.02212	2.74284
401720	FIGNL2	1.42507	-2.18079	#N/A	#N/A	200879	LIPH	-1.34349	2.31506	-4.67731	-1.34302
23769	FLRT1	2.93423	-1.8479	2.69962	3.82301	100505797	LOC100505797	-1.11355	1.31381	#N/A	#N/A
252995	FNDC5	1.37086	-2.1851	2.21892	1.91954	284344	LOC284344	-1.02216	1.29208	#N/A	#N/A
2295	FOXF2	1.19284	-1.12924	7.49128	7.42366	79442	LRRC2	-1.64299	3.14568	-1.99101	1.92594
100132074	FOXO6	1.10085	-1.92731	1.5618	0.0659706	23764	MAFF	-1.02831	4.18096	3.94007	4.15845
10023	FRAT1	1.29509	-1.27569	2.54772	1.54769	51257	MARCH2	-1.34266	1.4289	5.60584	3.78089
90167	FRMD7	2.47802	-3.26615	-0.60193	0.142085	57574	MARCH4	-1.69514	1.18088	4.31584	5.78136
442117	GALNTL6	1.1127	-3.34264	4.12196	3.41505	4155	MBP	-1.46438	5.03398	3.25172	0.709593
2624	GATA2	1.04649	-1.86361	5.25114	5.41632	84331	MCRIP2	-1.12021	1.02745	#N/A	#N/A
2625	GATA3	1.08087	-1.40178	3.67139	4.45433	79772	MCTP1	-1.112	3.29363	1.02939	1.40593
2634	GBP2	2.9072	-1.46155	3.3387	2.88329	23184	MESD	-1.10633	1.38908	#N/A	#N/A
2735	GLI1	1.21	-2.32401	3.10151	1.65318	8076	MFAP5	-1.21084	1.66805	0.68436	1.14208
148979	GLIS1	1.77125	-1.18704	5.38953	5.28534	84815	MGC12916	-1.19611	1.71433	0.628418	0.307404
54331	GNG2	1.87642	-2.37765	7.08505	7.78414	11343	MGLL	-1.89852	1.84962	7.33829	7.65412
221914	GPC2	1.70781	-1.1075	2.12116	2.53223	4500	MT1L	-1.57884	2.1796	#N/A	#N/A
29933	GPR132	2.53056	-2.7324	0.554679	0.825787	9788	MTSS1	-1.67416	2.78901	1.34107	1.65148
283554	GPR137C	1.70107	-3.84918	2.44321	3.60184	50804	MYEF2	-1.30864	1.09936	2.70604	2.96297
54329	GPR85	1.02693	-2.21886	3.47003	3.29136	84665	MYPN	-1.29468	1.08175	0.801824	5.37964
51704	GPRC5B	1.54501	-1.05109	5.10539	4.16166	102724371	NA	-1.98741	5.99748	#N/A	#N/A
285513	GPRIN3	1.06518	-5.66757	1.54458	1.67755	56926	NCLN	-1.01628	1.17978	6.93994	6.8727
160622	GRASP	1.46072	-2.19179	4.31211	2.68613	374987	NEXN-AS1	-1.28831	1.78402	1.29238	2.34374
64388	GREM2	1.72815	-2.73397	7.07372	8.38777	23114	NFASC	-1.61301	1.66246	6.02712	5.87515
57822	GRHL3	3.21264	-1.28125	1.3292	2.15549	25819	NOCT	-1.03984	2.28767	#N/A	#N/A
51454	GULP1	1.0199	-1.25544	4.68755	5.49259	4856	NOV	-1.69822	1.41855	5.19616	4.76904
23498	HAAO	1.34164	-1.29123	3.81176	2.24904	124056	NOXO1	-1.17417	1.46097	1.12488	1.99726
27198	HCAR1	2.0265	-2.21964	3.11441	1.85645	4862	NPAS2	-1.66556	2.21875	5.81347	4.63707
3280	HES1	1.09745	-1.99782	4.41578	2.9975	4883	NPR3	-1.0065	4.48781	-1.56255	1.18815
23462	HEY1	3.57524	-6.48992	6.20859	5.48662	4884	NPTX1	-1.16507	2.31637	3.38215	3.9611
3092	HIP1	1.21309	-2.0924	6.67753	6.76811	3164	NR4A1	-1.33542	4.68084	2.54968	2.44141
9324	HMGN3	1.55759	-1.94894	4.03602	4.55391	3084	NRG1	-1.27357	2.11646	3.67607	4.85878
3176	HNMT	1.60034	-2.02615	1.62355	0.816093	9542	NRG2	-1.22435	1.29661	-0.443061	0.255475
112817	HOGA1	2.22168	-2.26201	1.32792	1.53509	59277	NTN4	-2.44675	1.64604	3.38873	4.02344
3357	HTR2B	2.65055	-1.70804	2.04027	1.3301	4923	NTSR1	-2.02223	2.01878	5.24232	1.57613
3397	ID1	1.29355	-5.24854	8.9162	9.53534	11054	OGFR	-2.11957	1.00493	6.61779	4.23591
3398	ID2	2.28206	-5.75301	6.61492	7.57984	79627	OGFRL1	-1.48448	1.88914	5.88914	5.63747
3399	ID3	1.31056	-5.2919	8.67503	9.28431	23762	OSBP2	-1.08103	1.54692	3.74747	3.23784
10964	IFI44L	2.04644	-1.2361	2.86309	1.42756	5021	OXTR	-1.0581	2.21767	3.10875	7.07454
402778	IFITM10	1.20654	-2.39414	4.26486	3.96527	5069	PAPPA	-1.03794	1.47563	6.03092	7.38659
9543	IGDCC3	2.31524	-1.58043	-1.17854	0.912459	54852	PAQR5	-1.49792	2.419	2.38421	2.53027
50615	IL21R	1.69346	-2.68391	3.97111	3.46566	117583	PARD3B	-1.19346	1.02751	3.53197	4.30041
3560	IL2RB	1.29084	-2.57877	-0.297259	-1.41716	5137	PDE1C	-1.26326	2.07109	2.67994	2.73324
387755	INSC	4.53161	-7.67771	3.28549	2.31556	64065	PERP	-1.79245	1.207	8.0545	5.80425
203522	INTS6L	1.12659	-1.9128	#N/A	#N/A	5585	PKN1	-1.167	1.64751	6.45541	5.12366
117283	IP6K3	1.50984	-2.37822	-0.373763	-0.617812	23659	PLA2G15	-1.42109	1.48633	7.59124	6.16557
3718	JAK3	2.03483	-1.85608	1.84465	2.29039	200150	PLD5	-2.28419	1.59348	-1.97138	-0.919159
9832	JAKMIP2	3.1612	-1.58299	3.25099	1.89298	201164	PLD6	-1.09755	1.26271	2.74753	1.7789
81621	KAZALD1	1.1992	-2.51614	5.0969	3.95988	5339	PLEC	-1.67465	1.06998	10.5553	9.18594
84078	KBTBD7	1.1379	-2.12525	4.03178	4.35734	23207	PLEKHM2	-1.06279	1.08804	7.16641	6.24332
3750	KCND1	2.90833	-2.40424	4.87004	4.70238	5420	PODXL	-1.13959	1.24655	1.40994	2.04722
3754	KCNF1	1.21971	-5.51578	3.91774	3.50539	100101267	POM121C	-1.02752	1.43193	4.78713	4.44738
27345	KCNMB4	1.54029	-1.26898	2.19945	2.53938	5468	PPARG	-1.06244	1.09977	2.64787	1.83299
9674	KIAA0040	1.88176	-1.05035	3.31163	4.53858	10549	PRDX4	-1.00142	1.26995	5.80745	4.18712
85449	KIAA1755	1.05515	-4.65122	4.95724	2.21941	5563	PRKAA2	-1.2708	2.54999	1.70472	2.04466
3815	KIT	1.5839	-4.37074	3.5937	6.52394	127281	PRXL2B	-1.80729	1.84	#N/A	#N/A
113730	KLHDC7B	2.97916	-4.10503	0.879528	0.499157	5787	PTPRB	-2.32239	1.72009	-0.993273	-0.372689
340359	KLHL38	1.60241	-1.93123	-0.608216	2.45568	5817	PVR	-1.10419	1.92605	6.06967	7.16597
3875	KRT18	1.33107	-1.93908	3.64408	4.64873	10267	RAMP1	-1.03901	1.03612	3.69077	3.61884
197021	LCTL	1.3186	-4.16555	3.16519	3.4939	23108	RAP1GAP2	-1.75573	2.73651	2.64226	1.52184
3955	LFNG	2.14877	-2.99274	3.91708	4.73522	2889	RAPGEF1	-1.31728	1.51317	6.13114	6.17872
80774	LIMD2	1.48005	-2.19336	6.41948	5.89533	8045	RASSF7	-1.36968	2.08572	-5.11198	-5.06644
64130	LIN7B	1.03273	-2.98178	2.94351	3.47768	51308	REEP2	-1.1926	1.44629	5.67741	4.11335
100505576	LINC00672	1.6062	-1.04981	0.361606	1.60964	388	RHOB	-1.37547	1.10134	7.74444	7.63008
285084	LINC01305	1.29006	-1.03263	3.67685	1.10452	390	RND3	-1.13506	1.92063	8.6676	8.457
101929690	LINC01583	1.70866	-1.4322	#N/A	#N/A	57140	RNPEPL1	-1.0512	1.00232	6.60849	5.39865
101927244	LINC01788	1.98373	-3.01406	#N/A	#N/A	387841	RPL13AP20	-1.16282	1.92885	#N/A	#N/A
400548	LINC02139	1.32064	-4.40878	#N/A	#N/A	84870	RSPO3	-1.13513	1.41224	0.724138	-1.70465
100130417	LINC02593	2.58716	-5.86903	#N/A	#N/A	9711	RUBCN	-1.24494	1.3894	#N/A	#N/A
100129434	LOC100129434	1.01825	-4.02796	#N/A	#N/A	155370	SBDSP1	-1.09238	1.71035	#N/A	#N/A
101928433	LOC101928433	1.34725	-1.34022	#N/A	#N/A	85477	SCIN	-1.32988	2.06311	3.23395	5.39516
102723824	LOC102723824	1.06393	-1.52217	#N/A	#N/A	55800	SCN3B	-1.42023	2.00712	1.58528	-0.823369
728392	LOC728392	1.59991	-1.72094	#N/A	#N/A	6330	SCN4B	-1.24222	1.08268	4.5699	2.41718
2846	LPAR4	1.46295	-1.90982	-4.67731	0.917561	6334	SCN8A	-1.2152	1.41213	4.24528	4.42992
64101	LRRC4	1.33209	-3.47337	2.66358	4.02911	6404	SELPLG	-1.17997	1.13516	4.31854	4.08998
26045	LRRTM2	2.00515	-4.27844	3.39188	2.29193	5055	SERPINB2	-2.44766	3.11203	1.85214	4.99069
4058	LTK	1.19366	-1.62788	-2.90333	-1.42933	8710	SERPINB7	-1.29104	2.67301	3.87041	6.41494
56925	LXN	1.25891	-1.983	1.40081	0.268842	5054	SERPINE1	-1.53918	2.69135	8.5847	10.5226
116372	LYPD1	1.96494	-2.61562	5.06794	4.91515	80854	SETD7	-2.67851	1.14981	6.36001	6.13077
10586	MAB21L2	1.27419	-1.63575	1.92639	4.65343	166929	SGMS2	-1.87833	2.29264	3.10265	4.001
4094	MAF	1.89215	-2.27604	5.8062	5.31581	400745	SH2D5	-1.61969	3.73784	4.23142	5.21032
9935	MAFB	1.15032	-2.68582	3.82023	1.92038	22941	SHANK2	-1.39424	1.35262	2.0005	2.98591
5608	MAP2K6	2.82855	-1.5801	1.25105	2.2803	729993	SHISA9	-1.4696	3.83382	-0.0903659	2.73624
65108	MARCKSL1	1.2274	-2.2761	8.77452	8.34285	284266	SIGLEC15	-1.33718	1.47194	2.57557	0.624955
154141	MBOAT1	1.37026	-1.34149	1.61881	2.81009	150094	SIK1	-1.58059	2.74208	-5.11198	-5.06644
23263	MCF2L	1.06838	-3.94779	-1.5444	-0.854366	102724428	SIK1B	-1.51465	4.85182	#N/A	#N/A
2847	MCHR1	2.02925	-3.78542	1.95668	1.1662	6563	SLC14A1	-1.2271	1.44529	4.85288	-0.972522
4188	MDFI	2.29174	-5.57179	1.48068	0.432552	9120	SLC16A6	-1.3332	2.88045	1.89375	1.25781
130752	MDH1B	1.19238	-1.80041	0.548755	-0.707394	92745	SLC38A5	-1.10038	1.60555	4.00079	2.93457
25840	METTL7A	3.34916	-2.84698	4.32139	4.11459	84679	SLC9A7	-1.2327	1.64459	5.59904	6.38875
4239	MFAP4	1.92664	-1.52026	9.93728	6.73683	28231	SLCO4A1	-1.24457	4.30314	1.90133	0.934686
406937	MIR145	1.52561	-1.76427	3.2566	4.15773	8470	SORBS2	-1.08916	2.2602	0.769398	0.502474
100616387	MIR3064	1.24697	-1.72786	#N/A	#N/A	58472	SQOR	-1.25487	2.8346	#N/A	#N/A
84848	MIR503HG	1.33525	-5.5438	3.92722	3.63346	8128	ST8SIA2	-1.45868	1.5713	2.73062	3.57971
100616408	MIR5047	1.6622	-1.96363	#N/A	#N/A	6781	STC1	-1.26136	3.53898	5.06841	6.08145
4322	MMP13	1.50386	-1.91528	0.923931	-1.92201	29091	STXBP6	-1.51547	1.09109	1.31903	0.586074
55329	MNS1	1.03943	-1.2266	0.590598	1.91819	9144	SYNGR2	-1.07909	1.63961	4.72347	4.83968
4440	MSI1	1.02087	-1.73165	-2.42174	-1.39369	83851	SYT16	-2.05624	1.81728	-3.90333	1.82545
4487	MSX1	1.00622	-1.12467	9.29299	8.81673	9066	SYT7	-1.87936	3.69354	0.980864	-1.95765
4488	MSX2	1.19604	-1.78077	6.79374	5.1099	6863	TAC1	-1.46094	1.34912	1.25262	-1.25535
10903	MTMR11	1.18553	-1.08477	5.39255	4.25377	55357	TBC1D2	-1.10928	2.16443	4.06897	3.74606
29116	MYLIP	1.27734	-1.62419	5.90023	4.0817	6943	TCF21	-1.13713	1.0592	3.77965	4.40864
58529	MYOZ1	1.17277	-2.31885	-0.868906	0.399732	57451	TENM2	-1.27075	2.99727	2.4659	4.67685
91977	MYOZ3	1.46536	-3.29197	4.42439	3.45722	7980	TFPI2	-1.2808	2.88911	2.72944	4.43949
745	MYRF	1.3396	-1.25722	3.46703	2.11832	7052	TGM2	-1.66899	2.44058	8.70441	8.89889
55728	N4BP2	1.23462	-1.1474	2.66325	4.55171	7056	THBD	-1.70949	1.54379	0.855395	1.23508
101928747	NA	1.00164	-3.28535	#N/A	#N/A	55901	THSD1	-1.40682	2.27987	2.95181	1.64157
4675	NAP1L3	1.02991	-2.63356	5.05362	5.89441	57458	TMCC3	-1.109	1.84944	0.752407	-0.477285
10230	NBR2	1.07633	-1.28964	#N/A	#N/A	55092	TMEM51	-1.13547	1.83247	1.90313	1.72865
342897	NCCRP1	1.62348	-2.14563	-3.41202	-1.34763	58986	TMEM8A	-1.37471	1.13749	7.8661	6.40858
57447	NDRG2	1.36353	-1.11026	2.05777	-0.485395	83857	TMTC1	-1.5374	1.55097	3.367	5.12769
10529	NEBL	2.53731	-5.29752	0.186504	1.78299	4982	TNFRSF11B	-1.40929	4.66188	4.45865	5.03775
64168	NECAB1	1.09344	-2.2297	2.54947	2.85684	54863	TOR4A	-1.73196	1.53476	6.59073	5.81946
140825	NEURL2	1.48689	-1.84276	3.39605	2.94949	7171	TPM4	-1.61598	1.29881	10.2541	9.51802
4792	NFKBIA	1.28769	-1.48109	4.80907	5.88423	28576	TRBV12-4	-1.35062	2.11499	-5.11198	-3.71945
85407	NKD1	1.76412	-1.86047	0.043183	0.39048	57159	TRIM54	-2.00211	2.10509	-2.37501	-0.566308
54413	NLGN3	1.18802	-3.07609	1.69228	-0.398005	84675	TRIM55	-1.44759	1.20424	-3.90333	-1.07933
9241	NOG	1.31681	-4.56369	4.747	4.26891	22996	TTC39A	-1.06785	1.19309	2.51277	0.57192
147111	NOTUM	3.28014	-6.73045	1.49232	-0.109545	158135	TTLL11	-1.3181	1.29955	3.17818	3.23811
222950	NYAP1	1.13686	-1.1372	3.91395	2.84457	7425	VGF	-2.08101	3.32659	1.33813	-0.40896
152816	ODAPH	1.31413	-1.84254	#N/A	#N/A	81552	VOPP1	-1.61647	1.59328	2.99917	3.04191
55753	OGDHL	1.0132	-1.47532	2.40433	1.92017	139735	ZFP92	-1.15093	2.32008	-5.11198	-5.06644
4958	OMD	1.3726	-3.06144	1.17887	-1.23572	51222	ZNF219	-1.43839	1.78806	6.99672	4.42469
54873	PALMD	1.39455	-4.70866	0.582002	1.5861	195828	ZNF367	-1.23013	2.74154	0.933895	3.48115
116337	PANX3	1.25284	-3.15073	0.24807	0.251636	90333	ZNF468	-1.74962	1.54317	3.85068	2.97078
5087	PBX1	1.25771	-1.85683	5.89148	5.4202	147660	ZNF578	-1.71345	1.03197	1.21476	1.10781
9468	PCYT1B	1.55816	-2.70486	3.02496	1.75428
27250	PDCD4	1.0009	-1.53881	7.02151	6.80473
5136	PDE1A	1.93125	-1.80465	-0.400517	-0.725993
5159	PDGFRB	1.33464	-1.64119	9.51629	9.03067
79605	PGBD5	1.31057	-3.34307	2.7887	2.32528
5228	PGF	2.93243	-1.95502	5.32322	5.16785
162466	PHOSPHO1	1.42424	-4.91285	0.704447	0.281799
8503	PIK3R3	1.96534	-1.53602	6.1	8.255
5308	PITX2	1.25852	-2.48406	-0.824044	2.5843
494513	PJVK	1.44389	-1.08455	#N/A	#N/A
51316	PLAC8	2.55995	-2.75189	-2.90333	-0.823369
22874	PLEKHA6	1.6764	-2.15269	4.13751	4.14228
5354	PLP1	2.40499	-1.51737	1.51343	0.992451
29944	PNMA3	1.55682	-1.95337	-0.698432	0.427706
10631	POSTN	1.1906	-1.34717	8.57865	6.87371
23627	PRND	3.82651	-3.74098	0.206493	2.60764
5961	PRPH2	1.06599	-2.99171	3.13893	3.12591
51450	PRRX2	1.82178	-2.4358	7.06851	6.72461
167681	PRSS35	1.25545	-2.94435	4.65092	3.24401
9536	PTGES	2.18195	-1.55961	6.90669	6.92106
5740	PTGIS	3.59442	-3.14977	2.83456	1.30625
115273	RAB42	1.04376	-1.4922	2.8185	1.3793
353091	RAET1G	1.10255	-1.42143	1.79002	1.00596
5915	RARB	2.38095	-3.51576	0.00474155	2.28589
23551	RASD2	2.4829	-2.74801	3.24104	5.44685
65997	RASL11B	4.43009	-6.08688	3.34404	3.94105
283248	RCOR2	1.48315	-2.5395	2.52961	1.4978
130132	RFTN2	1.37567	-1.00524	3.93839	2.72188
6041	RNASEL	1.24688	-1.16188	3.93796	4.0565
7732	RNF112	1.30031	-3.97158	5.36617	2.63554
9252	RPS6KA5	2.24502	-2.45513	0.508803	1.79369
340419	RSPO2	2.57424	-3.10027	1.25857	1.88645
146760	RTN4RL1	1.04289	-1.53967	1.76458	1.8244
148398	SAMD11	3.27505	-6.47785	5.735	5.84256
619207	SCART1	1.32727	-1.30547	#N/A	#N/A
6328	SCN3A	2.19756	-2.82607	-0.96755	-0.724883
222663	SCUBE3	1.71451	-1.15275	4.08075	3.3674
8991	SELENBP1	1.70709	-1.04521	3.61008	2.59242
6414	SELENOP	1.10801	-1.8115	#N/A	#N/A
80031	SEMA6D	1.47733	-3.19615	4.59682	5.17947
285540	SEPSECS-AS1	1.09941	-1.28023	#N/A	#N/A
143686	SESN3	1.93923	-2.78466	6.47933	7.84591
90525	SHF	1.33951	-2.31621	3.20076	2.68299
57568	SIPA1L2	1.45278	-1.58398	3.69313	4.24757
387640	SKIDA1	1.79562	-2.75888	1.71048	2.85435
220963	SLC16A9	1.93887	-5.6303	4.02775	3.94855
89874	SLC25A21	1.08108	-1.0954	5.43671	4.80352
154091	SLC2A12	1.35413	-1.27475	3.4278	4.04349
10991	SLC38A3	1.30295	-4.15655	-0.247593	-0.799489
85414	SLC45A3	1.1719	-1.81791	3.52816	3.99034
84189	SLITRK6	1.8509	-5.95386	3.24352	3.63598
4091	SMAD6	2.25071	-5.60519	6.47381	7.27588
4092	SMAD7	1.48824	-3.21855	7.10315	7.53428
4093	SMAD9	2.60135	-4.15218	4.8356	6.68211
341346	SMCO2	1.35917	-2.75876	-1.18151	-2.37132
6615	SNAI1	2.42438	-2.51573	6.00368	6.22465
6591	SNAI2	1.25628	-4.54542	8.30864	8.6427
26822	SNORD14A	1.0388	-1.16454	#N/A	#N/A
8835	SOCS2	1.28717	-1.27357	4.26903	6.31622
50964	SOST	5.1941	-7.12674	1.86145	2.7283
6659	SOX4	2.1827	-2.92754	7.96332	7.75796
30812	SOX8	1.00054	-5.59346	1.32334	0.123935
80320	SP6	1.32688	-3.15483	0.787636	0.68613
121340	SP7	5.68052	-11.0122	4.9705	4.51468
222183	SRRM3	1.12649	-4.1815	0.930279	0.0831474
6751	SSTR1	1.16668	-3.43716	0.776514	2.8316
6752	SSTR2	2.20781	-1.26496	-0.0347389	1.03094
256435	ST6GALNAC3	1.64799	-1.38458	2.41728	1.14757
11037	STON1	2.27532	-2.32963	5.91188	6.44181
64220	STRA6	2.95883	-2.66442	-0.491685	-0.664483
6817	SULT1A1	1.2077	-1.38969	-4.09832	-2.4738
27233	SULT1C4	3.67884	-2.18487	1.04763	1.51106
126074	SWSAP1	1.21547	-1.70509	2.19791	2.20438
11346	SYNPO	1.20634	-2.64936	6.93304	7.4249
84958	SYTL1	1.49733	-2.14194	1.93146	-0.277871
94122	SYTL5	1.71842	-4.33041	2.10857	1.41126
30009	TBX21	1.01926	-5.66999	-2.28585	-3.05279
6926	TBX3	1.02853	-1.43577	8.64735	9.11914
9496	TBX4	1.15455	-1.91906	-0.671528	-2.37132
7072	TIA1	1.01242	-1.31993	6.08096	6.72407
7096	TLR1	1.34256	-2.70927	0.0668793	0.791719
132332	TMEM155	2.48508	-1.23496	1.39232	3.9399
147744	TMEM190	1.01605	-1.95216	-1.4735	-4.24777
219623	TMEM26	3.58801	-2.81873	3.47209	3.07822
140738	TMEM37	2.05609	-4.27424	1.76279	-0.342167
120939	TMEM52B	2.25601	-3.13002	-2.07272	0.0488867
144110	TMEM86A	1.05675	-3.42035	3.93267	3.83633
8460	TPST1	1.08396	-1.8869	6.4639	7.15451
10906	TRAFD1	1.05935	-1.43175	5.34925	6.00864
9865	TRIL	3.78025	-2.31611	4.51666	2.55978
440730	TRIM67	2.48874	-2.33116	-1.70835	4.18777
7216	TRO	1.21567	-1.3173	6.66549	6.4246
7222	TRPC3	1.80236	-1.86843	-0.309548	0.499443
59341	TRPV4	1.958	-2.07269	4.23443	4.24392
441631	TSPAN11	1.05025	-1.83153	8.18959	5.75248
90139	TSPAN18	2.20617	-2.98445	1.58944	0.854105
10077	TSPAN32	1.51027	-1.49028	4.07644	0.923403
9256	TSPOAP1	1.2559	-1.22696	#N/A	#N/A
113691	TUBA3FP	1.98644	-2.91567	#N/A	#N/A
10628	TXNIP	1.58967	-1.29587	7.7234	6.74011
134111	UBE2QL1	1.31175	-2.15799	1.26448	3.20135
219699	UNC5B	2.12844	-3.33134	8.20786	7.09288
373856	USP41	1.57266	-1.75787	-5.01064	-5.06644
6843	VAMP1	1.63252	-1.45883	4.34076	4.57564
79805	VASH2	2.51757	-3.23179	3.5737	3.99224
57687	VAT1L	2.48435	-1.52374	4.89579	4.90039
7412	VCAM1	1.96884	-1.5345	0.824457	3.14681
100288778	WASH8P	1.49767	-1.34246	#N/A	#N/A
8840	WISP1	3.36169	-1.63159	2.62173	3.36801
7480	WNT10B	1.80931	-1.61625	2.5025	3.95548
219539	YPEL4	1.27791	-3.07152	1.72606	-0.362
170261	ZCCHC12	1.0238	-2.12769	0.740678	-0.637865
151126	ZNF385B	2.16598	-3.14425	0.485595	0.689945
23090	ZNF423	1.67498	-4.18674	3.6887	1.05512
168544	ZNF467	1.02852	-2.35149	2.40924	-1.85034
118738	ZNF488	1.05437	-2.18563	0.315275	0.327065
57507	ZNF608	1.63443	-1.13823	3.4676	4.73408
7552	ZNF711	1.71294	-2.96966	3.31019	4.03956
